# Supplementary material for: A Multicenter Phase I Study of Pazopanib in Combination with Paclitaxel in First-Line Treatment of Patients with Advanced Solid Tumors
Source: Oxford University Press journal article supplement (doi:10.1158/1535-7163.mct-14-0431), 2014-12-10
Supplement: 15357163mct140431-sup-131935_1_supp_2730567_nqj1bl.doc [file 15357163mct140431-sup-131935_1_supp_2730567_nqj1bl.doc]

**Supplementary Table 2.** Pharmacokinetic data for a cohort 1 patienta with hepatotoxicity dose-limiting toxicity

| PK sample dateb  (time from last pazopanib/simvastatin dose) | Pazopanib (g/mL) | Simvastatin (ng/mL) | Simvastatin acid (ng/mL) |
| --- | --- | --- | --- |
| 10 Sept 2009 (7 h/16.5 h) | 57 | 14.7 | 20.1 |
| 16 Sept 2009 (150 h/16 h) | 18 | 2.9 | 9.4 |
| 01 Oct 2009 (~500 h/~ 366 h) | 0.72 | NQ | NQ |

a The patient had asymptomatic grade 4 elevated hepatic enzymes with grade 2 bilirubin elevation after the administration of one dose of paclitaxel (135 mg/m2) and 21 days of pazopanib, which the patient took as 400 mg twice daily (in error) instead of 800 mg once daily.

b Paclitaxel blood samples drawn on Cycle 1 Day 2 and Cycle 1 Day 3 over the 24 hours following the administration of paclitaxel (as a 3-hour infusion) demonstrated exposures in the expected range for 135 mg/m2 paclitaxel (peak plasma concentration at 3 hours was 3205 ng/mL).

Abbreviations: NQ, not quantifiable.
