# Supplementary material for: A Multicenter Phase I Study of Pazopanib in Combination with Paclitaxel in First-Line Treatment of Patients with Advanced Solid Tumors
Source: Oxford University Press journal article supplement (doi:10.1158/1535-7163.mct-14-0431), 2014-12-10
Supplement: 15357163mct140431-sup-131935_1_supp_2730568_njj1bl.doc [file 15357163mct140431-sup-131935_1_supp_2730568_njj1bl.doc]

**Supplementary Table 3**. Drug exposure

|  | Dose level | | | |
| --- | --- | --- | --- | --- |
| Cohort 1  Paclitaxel 135 mg/m2 + Pazopanib 800 mg | Cohort 2  Paclitaxel 175 mg/m2 + Pazopanib 800 mg | Cohort 3  Paclitaxel 150 mg/m2 + Pazopanib 800 mg | Cohort 4  Paclitaxel 175 mg/m2 + Pazopanib 400 mg |
| n | 6 | 4 | 12 | 6 |
| Exposure |  |  |  |  |
| Paclitaxel |  |  |  |  |
| Median number of cycles (range) | 5.5 (1 - 6) | 5.0 (1 - 6) | 5.5 (1 - 6) | 6.0 (2 - 6) |
| Median dose (range) | 135 (131 - 135) | 175 (152 - 175) | 150 (130 - 150) | 175 (146 - 175) |
| Pazopanib |  |  |  |  |
| Median dose (range) | 800 (800 - 800) | 737 (610 - 800) | 800 (564 - 800) | 400 (400 - 400) |
