# Supplementary material for: A Multicenter Phase I Study of Pazopanib in Combination with Paclitaxel in First-Line Treatment of Patients with Advanced Solid Tumors
Source: Oxford University Press journal article supplement (doi:10.1158/1535-7163.mct-14-0431), 2014-12-10
Supplement: 15357163mct140431-sup-131935_1_supp_2730569_n6j1bl.doc [file 15357163mct140431-sup-131935_1_supp_2730569_n6j1bl.doc]

**Supplementary Table 4.** Summary of paclitaxel pharmacokinetic parameters

| Dose level | nb | AUC(0-) (g•hr/mL) | | CL (L/hr) | | Cmax (g/mL) | | Vss (L) | | t1/2(hr)a | |
| --- | --- | --- | --- | --- | --- | --- | --- | --- | --- | --- | --- |
| Cycle 1  Paclitaxel alone | Cycle 2  Paclitaxel + Pazopanib | Cycle 1  Paclitaxel alone | Cycle 2  Paclitaxel + Pazopanib | Cycle 1  Paclitaxel alone | Cycle 2  Paclitaxel + Pazopanib | Cycle 1  Paclitaxel alone | Cycle 2  Paclitaxel + Pazopanib | Cycle 1  Paclitaxel alone | Cycle 2  Paclitaxel + Pazopanib |
| Cohort 1  Paclitaxel 135 mg/m2 + Pazopanib 800 mg | 5 | 9.00 (7.55, 10.7) 18.6 | 11.3 (9.15, 14.0) 22.5 | 28.8 (22.5, 37.0) 26.5 | 22.8 (17.2, 30.3) 30.4 | 2.73 (2.15, 3.46) 25.4 | 3.34 (2.54, 4.39) 29.2 | 126 (96.3, 164) 28.6 | 92.1 (65.5, 129) 36.9 | 6.99 (6.43, 7.55) | 6.74 (6.08, 7.40) |
| Cohort 2  Paclitaxel 175 mg/m2 + Pazopanib 800 mg | 4 | 16.0 (10.9-19.7)c | 20.8, 21.6 | 22.3 (20.3-39.1)c | 16.1, 18.6 | 5.02 (3.30-6.25)c | 6.59 (3.71-6.87)c,d | 115 (86.2, 153) 24.6 | 64.0, 71.7 | 5.82 (5.27, 6.38) | 5.67, 5.68 |
| Cohort 3  Paclitaxel 150 mg/m2 + Pazopanib 800 mg | 11 | 11.8 (10.5, 13.2) 21.2 | 16.6e (14.7, 18.9) 20.5 | 23.6 (20.7, 26.9) 24.4 | 16.6e (14.4, 19.5) 23.3 | 3.32 (2.96, 3.72) 21.3 | 4.83e (4.20, 5.56) 23.0 | 98.9 (86.3, 113) 25.4 | 71.9e (63.4, 81.5) 20.5 | 6.03 (5.39, 6.70) | 6.62e (6.26, 6.99) |
| Cohort 4  Paclitaxel 175 mg/m2 + Pazopanib 400 mg | 6 | 13.9 (10.5, 18.4) 35.0 | 15.3f (10.2, 23.0) 44.3 | 24.6 (17.4, 34.8) 44.1 | 21.2f (13.7, 32.9) 48.5 | 4.47 (3.55, 5.62) 28.5 | 4.58f (2.80, 7.49) 55.3 | 85.9 (66.8, 110) 31.3 | 93.3f (60.1, 145) 48.7 | 5.93 (4.11, 6.68) | 6.60f (5.91, 7.29) |

a Data presented as arithmetic mean (95% confidence interval).

b While the pharmacokinetic population consisted of all patients for whom a pharmacokinetic sample was obtained and analyzed, not all patients had pharmacokinetic samples available for cycle 2 treatment; cohort 2 had limited pharmacokinetic data available due to dose-limiting toxicities and only 2 patients had data for cycle 2.

c Data presented as median (range).

d n=3.

e n=9.

f n=5.

Abbreviations: AUC(0-∞), AUC extrapolated to infinity; CL, systemic clearance; Cmax, maximum concentration; Vss, steady state volume of distribution; t1/2, elimination half-life.
